# Supplementary material for: SEN1990 is a predicted winged helix-turn-helix protein involved in the pathogenicity of Salmonella enterica serovar Enteritidis and the expression of the gene oafB in the SPI-17
Source: Frontiers journal article supplement (doi:10.3389/fmicb.2023.1236458), 2023-11-03
Supplement: Table_3.PDF [file Table_3.PDF]

**Supplementary Table 3. Mice clinical score parameters**

| Parameter                            | Criteria                                                                                                                                                        | Score | Periodicity |
|--------------------------------------|-----------------------------------------------------------------------------------------------------------------------------------------------------------------|-------|-------------|
| <b>Loss of body weight</b>           | There is no loss of body weight, or it is less than 5%.                                                                                                         | 0     | Daily       |
|                                      | Loss of body weight is between 5-10%.                                                                                                                           | 1     |             |
|                                      | Loss of body weight is between 10-20%.                                                                                                                          | 2     |             |
|                                      | Loss of body weight is higher than 20%.                                                                                                                         | 3     |             |
| <b>Aspect</b>                        | Straight posture, hang from the cage, and its fur is lustrous.                                                                                                  | 0     | Daily       |
|                                      | Avoids movement, fur is scruffy, might have red secretion from nose or eyes.                                                                                    | 1     |             |
|                                      | Curved posture, immobile and at the back of the cage, abulic, fur is scruffy, red secretion from nose or eyes.                                                  | 2     |             |
|                                      | Prostrate, lateral decubitus position, evident dehydration, sunken eyes.                                                                                        | 3     |             |
| <b>Spontaneous behavior</b>          | Aware of its surroundings, interacts with peers, grooms itself.                                                                                                 | 0     | Daily       |
|                                      | Small changes: Reduces grooming and displacement, rapid respiratory movements, tends to remain at the end of the cage.                                          | 1     |             |
|                                      | Wobbly displacement, inactive or separated at the back of the cage, abdominal breathing.                                                                        | 2     |             |
|                                      | Mouse is immobile, lateral decubitus position, gaps mouth to breath.                                                                                            | 3     |             |
| <b>Hydration</b>                     | Thoracic back skin return time is less than 2 seconds when pinched, normal posture, eye globe with no alterations.                                              | 0     | Daily       |
|                                      | Thoracic back skin return time is less than 2 to 4 seconds when pinched, piloerection, body weight loss between 10 to 15%, reduced movement in the cage.        | 1     |             |
|                                      | Thoracic back skin return time is between 2 to 4 seconds when pinched, body weight loss higher than 15%, piloerection, curved posture, weakness, and dry feces. | 2     |             |
|                                      | Thoracic back skin return time is higher than 5 seconds when pinched, curved posture, sunken eyes is evident, impossibility to stand by itself.                 | 3     |             |
| <b>General evaluation of colitis</b> | Well-formed feces, no alterations of the anus                                                                                                                   | 0     | Daily       |
|                                      | Alteration of the feces consistency: Mushed or dry feces but well-formed, presence of mucus.                                                                    | 1     |             |
|                                      | Soft feces or absence of depositions, hematochezia, slight alterations of the perianal zone such as edema, perianal dermatitis.                                 | 2     |             |
|                                      | Diarrhea or constipation with tenesmus, hematochezia, might have melena, evident perianal alterations.                                                          | 3     |             |
